# Supplementary material
Source: publisher figshare collection journal article supplement (https://acs.figshare.com/ndownloader/files/3900766)
Supplement: Supplementary file 1 [file 3900766]

# Supporting Information

## Luminescence Properties of 1,8-naphthalimide Derivatives in Solution, in Their Crystals and in Co- Crystals: Towards Room Temperature Phosphorescence from Organic Materials

*Barbara Ventura,<sup>\*,§</sup> Alessio Bertocco,<sup>‡</sup> Dario Braga,<sup>‡</sup> Luca Catalano,<sup>‡</sup> Simone d'Agostino,<sup>‡</sup>  
Fabrizia Grepioni<sup>\*,‡</sup> and Paola Taddei<sup>\*,□</sup>*

<sup>§</sup> Istituto ISOF-CNR, Via P. Gobetti 101, 40129 Bologna, Italy.

<sup>‡</sup> Dipartimento di Chimica G. Ciamician, Università di Bologna, Via F. Selmi 2, 40126 Bologna

<sup>□</sup> Dipartimento di Scienze Biomediche e Neuromotorie, Università di Bologna, Via Belmeloro 8/2,  
40126 Bologna

### Table of Contents

|                                                     |         |
|-----------------------------------------------------|---------|
| Absorption and luminescence data in solution        | page S2 |
| IR spectra                                          | page S6 |
| Absorption and luminescence data in the solid state | page S8 |
| X-ray data                                          | page S9 |

## Absorption and luminescence data in solution

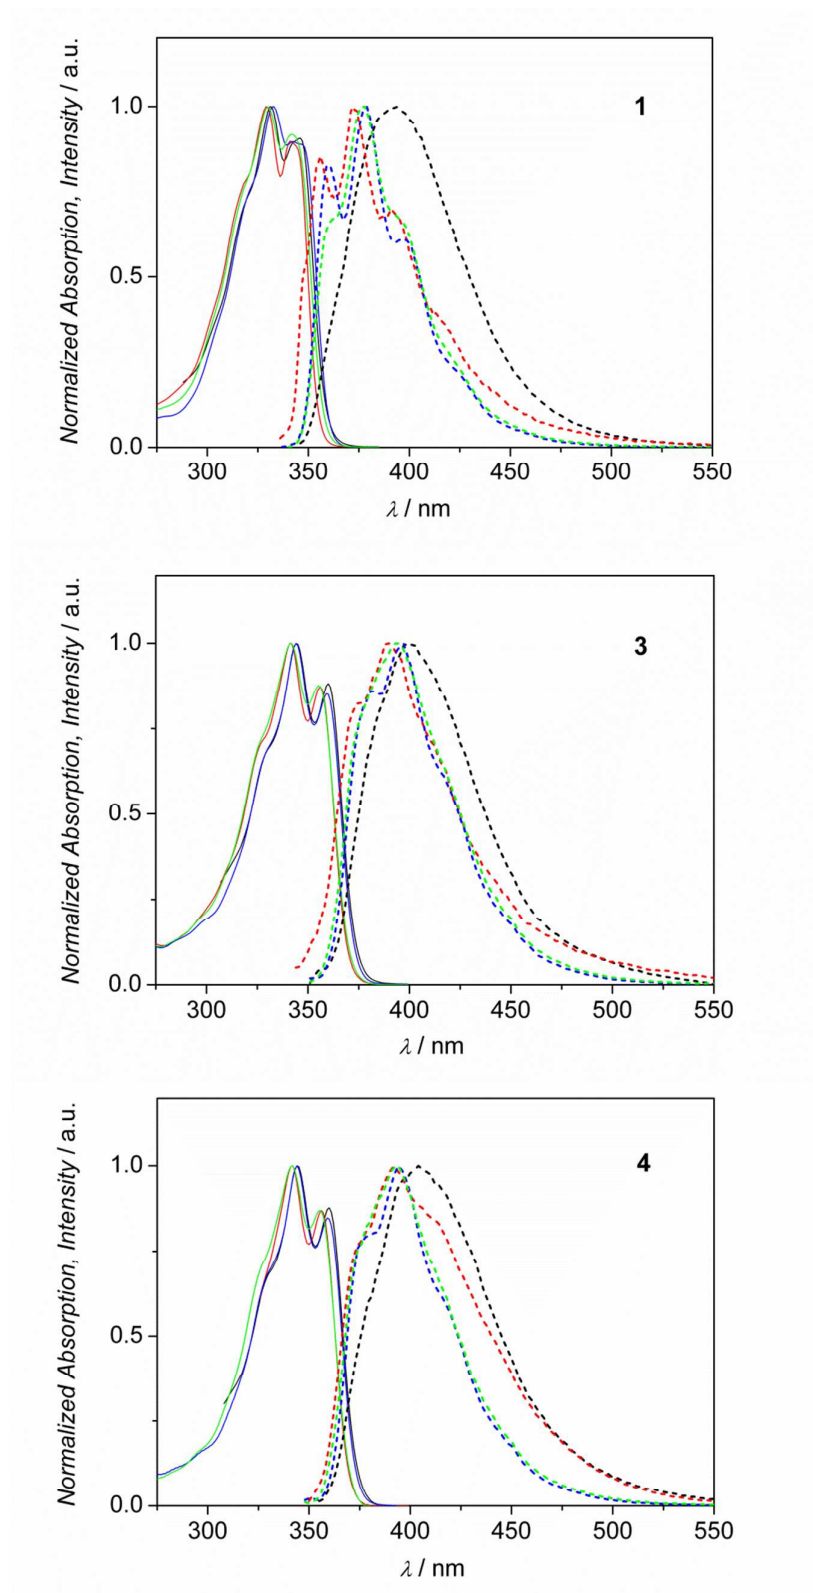

**Figure S1.** Absorption (full lines) and emission (dotted lines) spectra of **1**, **3**, and **4** in TOL (black), THF (red), DCM (blue) and ACN (green). Excitation at 330 nm for **1** and at 340 nm for **3** and **4**.

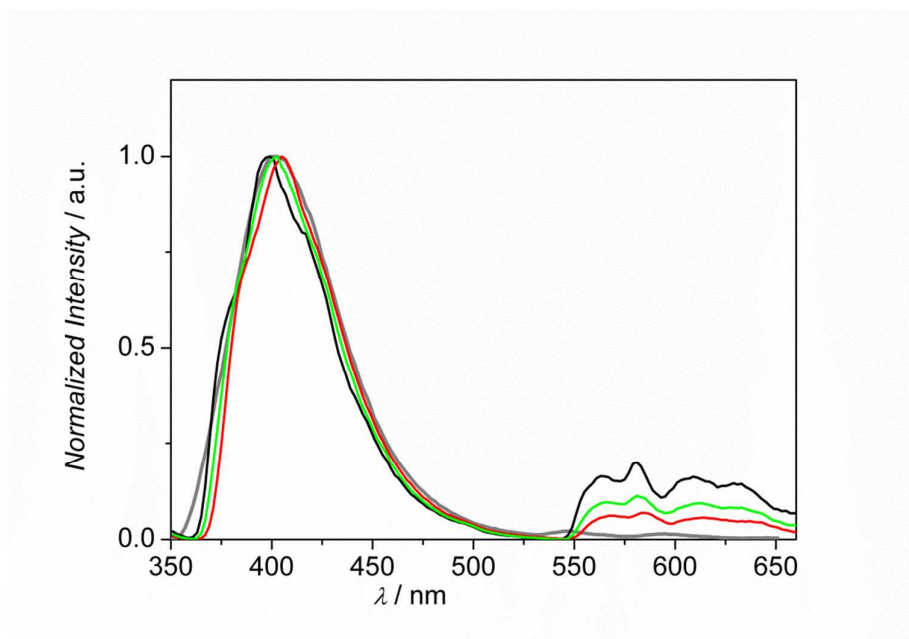

**Figure S2.** Luminescence spectra of **1** (gray), **2** (black), **3** (red) and **4** (green) in TOL at 77 K. Excitation at 330 nm. The spectra are normalized on the maximum of fluorescence.

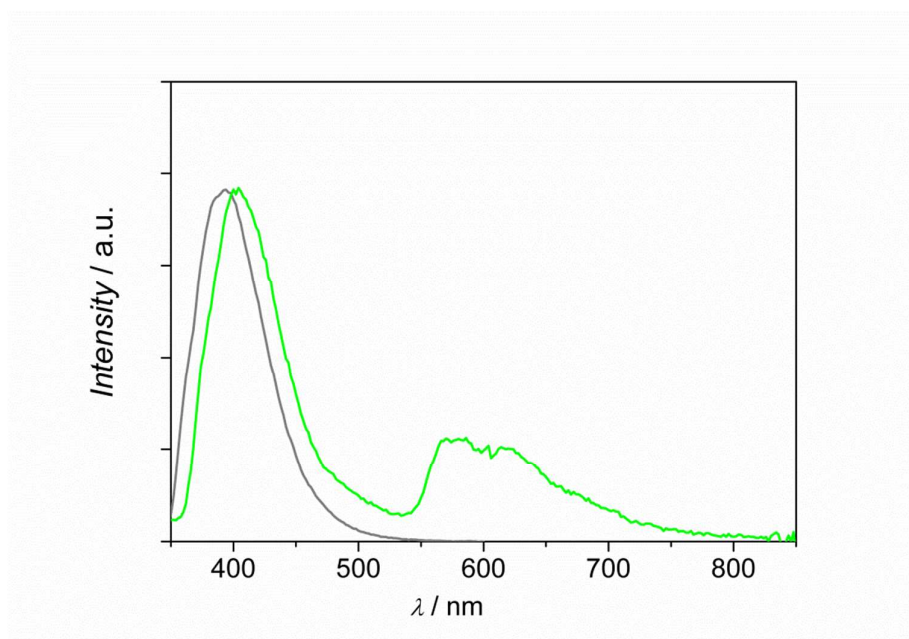

**Figure S3.** Luminescence spectra of **1** (grey) and **4** (green) in air-free TOL at room temperature. Excitation at 310 nm. The spectra are normalized on the maximum of fluorescence intensity.

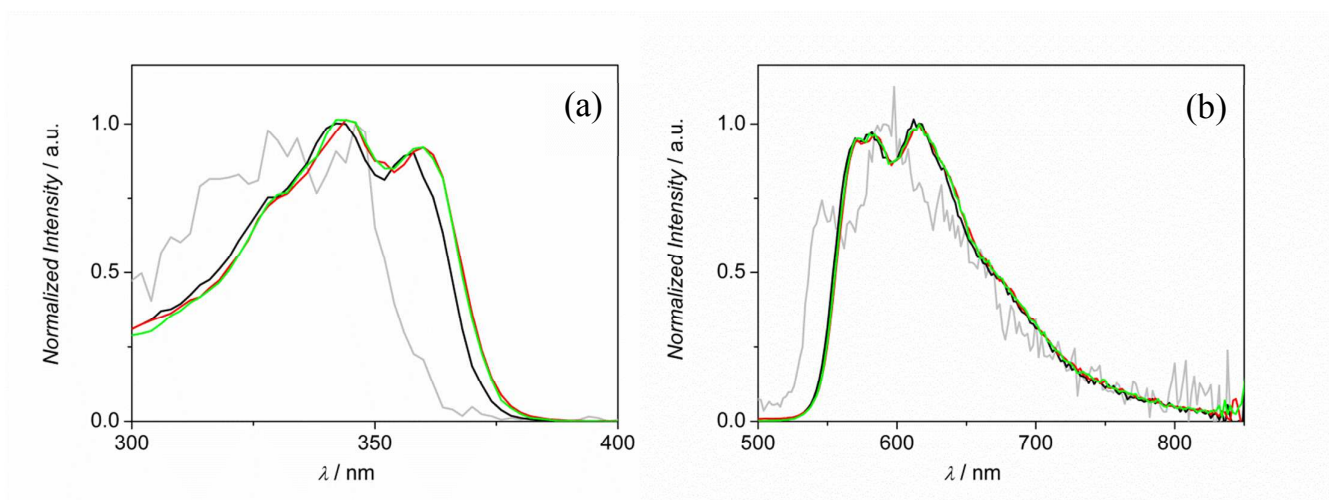

**Figure S4.** Excitation (a) and phosphorescence (b) spectra of **1** (gray), **2** (black), **3** (red) and **4** (green) in air-free TOL at room temperature, registered in gated mode. Gating parameters: delay: 0.1 ms, gate: 0.2-0.5 ms. In (a)  $\lambda_{\text{em}} = 600 \text{ nm}$ ; in (b)  $\lambda_{\text{exc}} = 340 \text{ nm}$ .

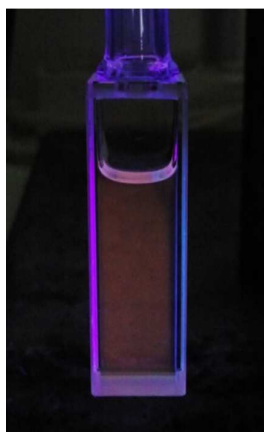

**Figure S5.** Picture of an air-free TOL solution of **4** upon UV irradiation (UVGL-55 lamp).  $A_{340} = 0.080$ .

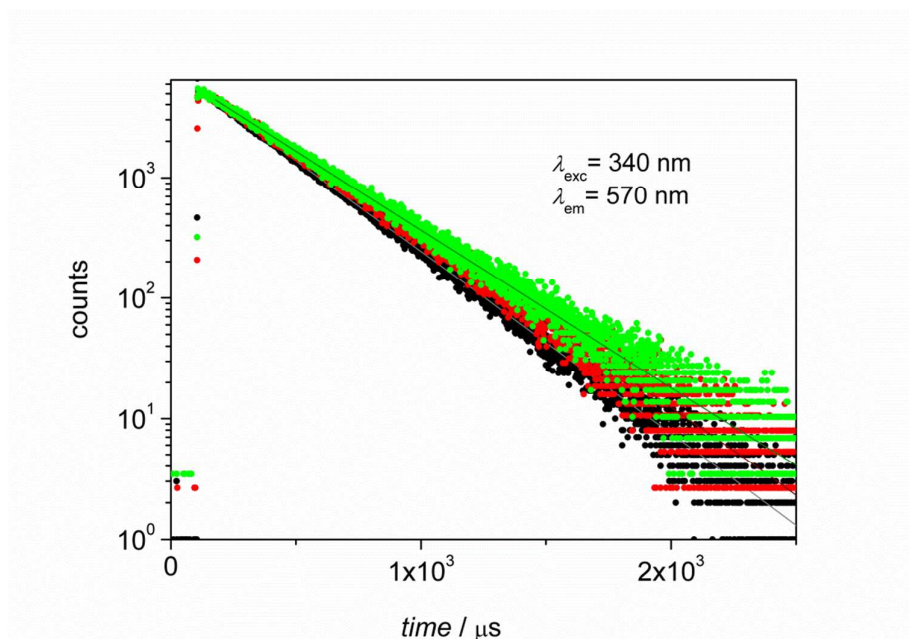

**Figure S6.** Phosphorescence decays, on a semi-log scale, of **2** (black), **3** (red) and **4** (green) in air-free TOL at room temperature and mono-exponential fittings.

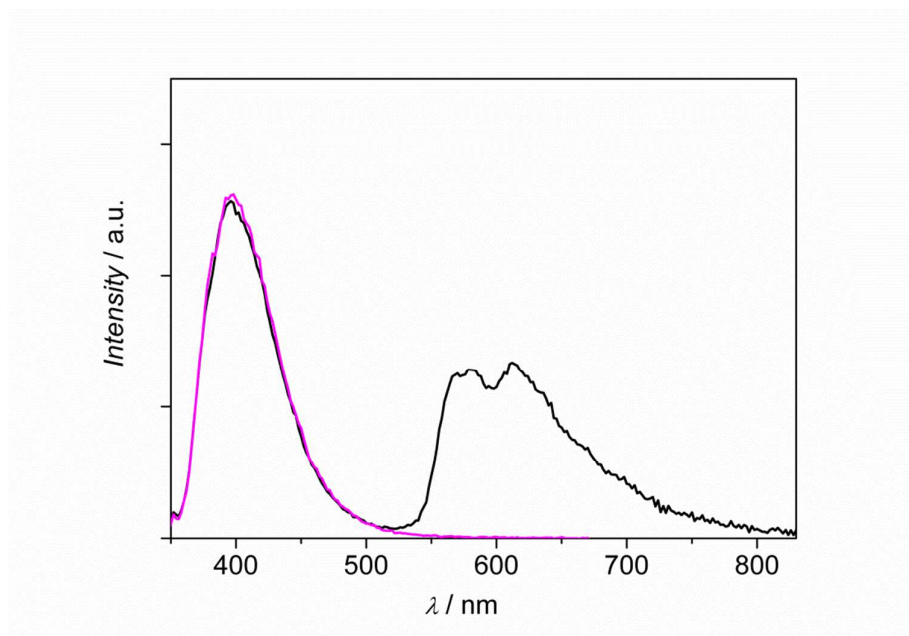

**Figure S7.** Luminescence spectra from optically matched TOL solutions of **2** in air-free solution (black) and in air-equilibrated solution (pink). Excitation at 340 nm,  $A_{340} = 0.080$ .

## IR Spectra

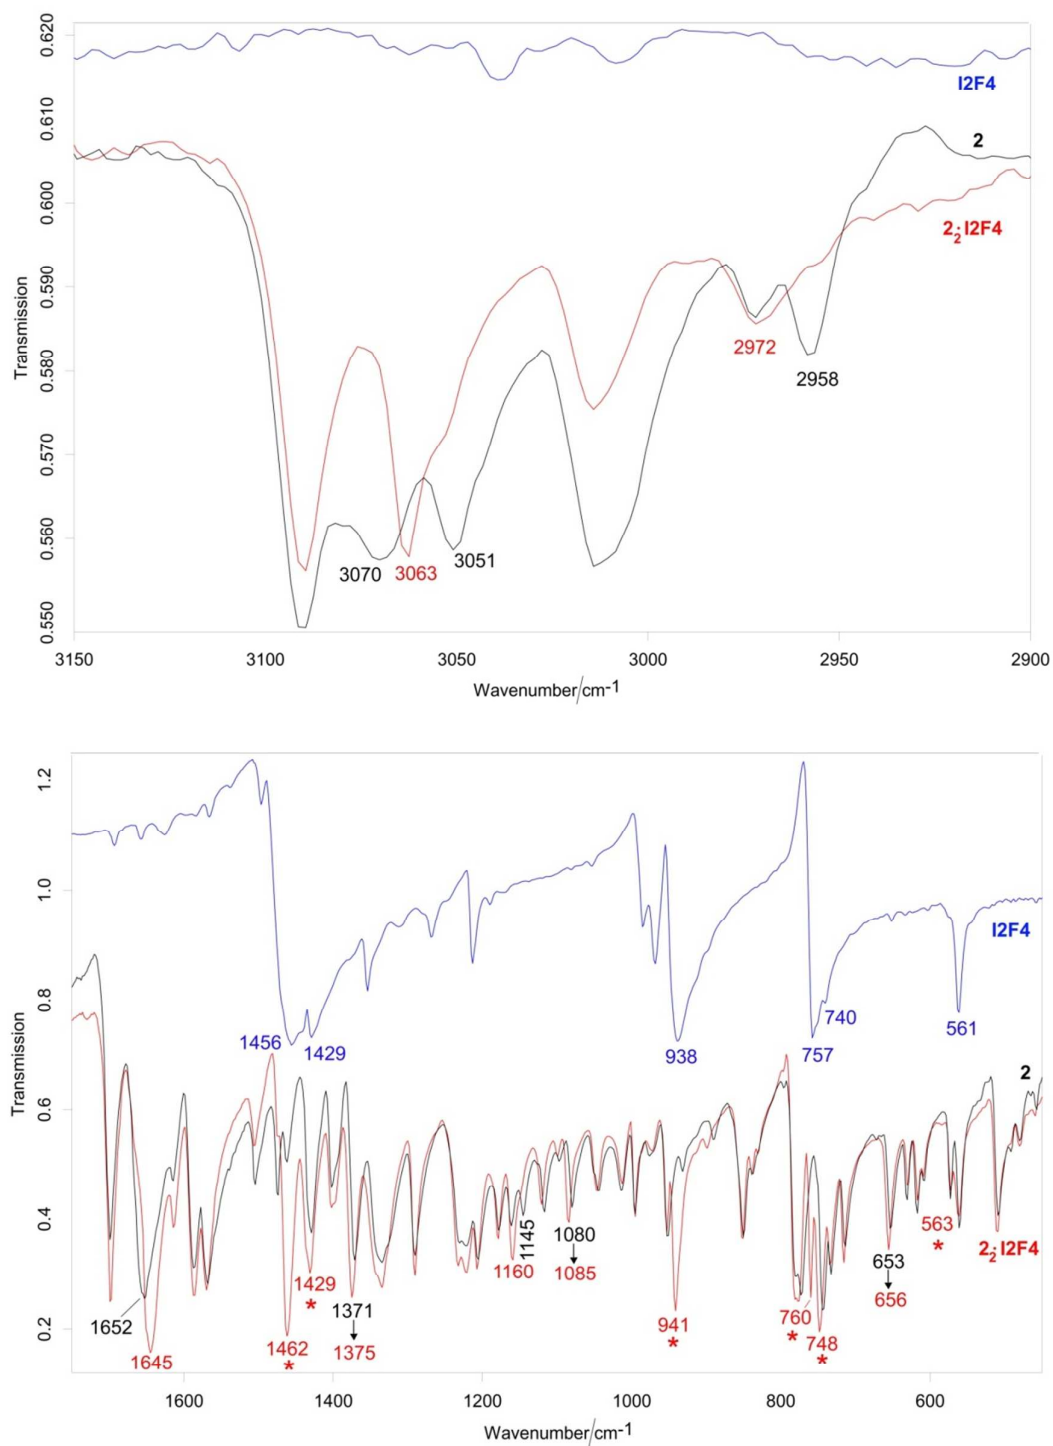

**Figure S8.** 3150-2900  $\text{cm}^{-1}$  (top) and 1750-450  $\text{cm}^{-1}$  (bottom) IR spectra of **2** (black), **I2F4** (blue) and **2<sub>2</sub>·I2F4** (red). The bands of **I2F4** are indicated with an asterisk.

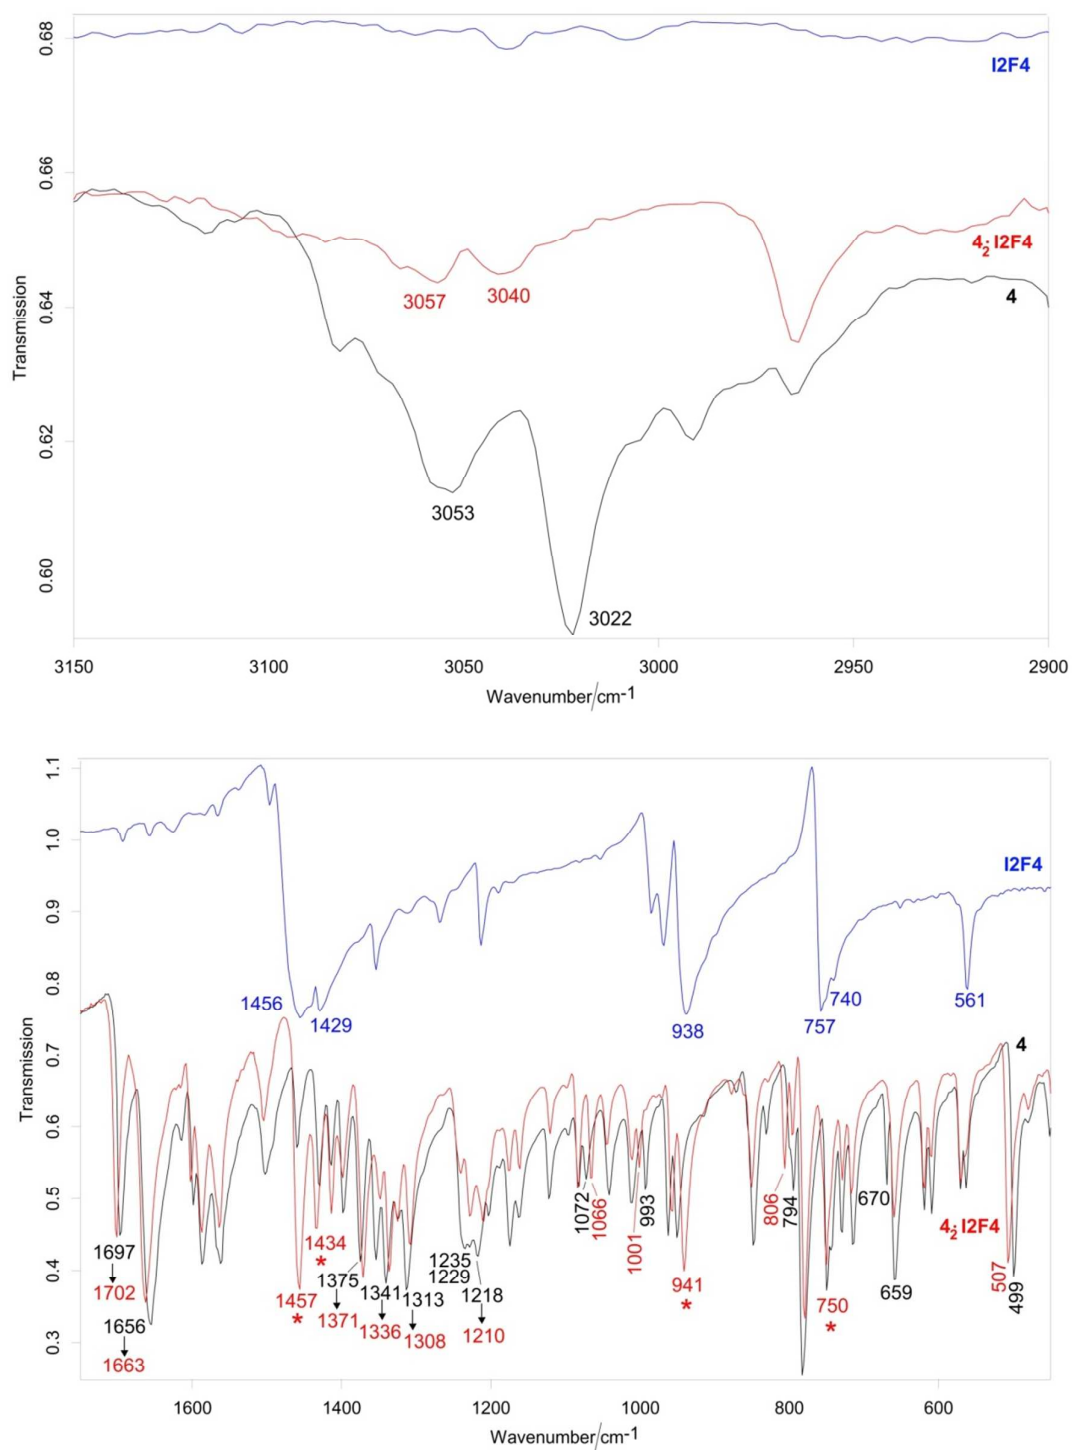

**Figure S9.** 3150-2900 cm<sup>-1</sup> (top) and 1750-450 cm<sup>-1</sup> (bottom) IR spectra of **4** (black), **12F4** (blue) and **4<sub>2</sub>·12F4** (red). The bands of 12F4 are indicated with an asterisk.



## Absorption and luminescence data in the solid state

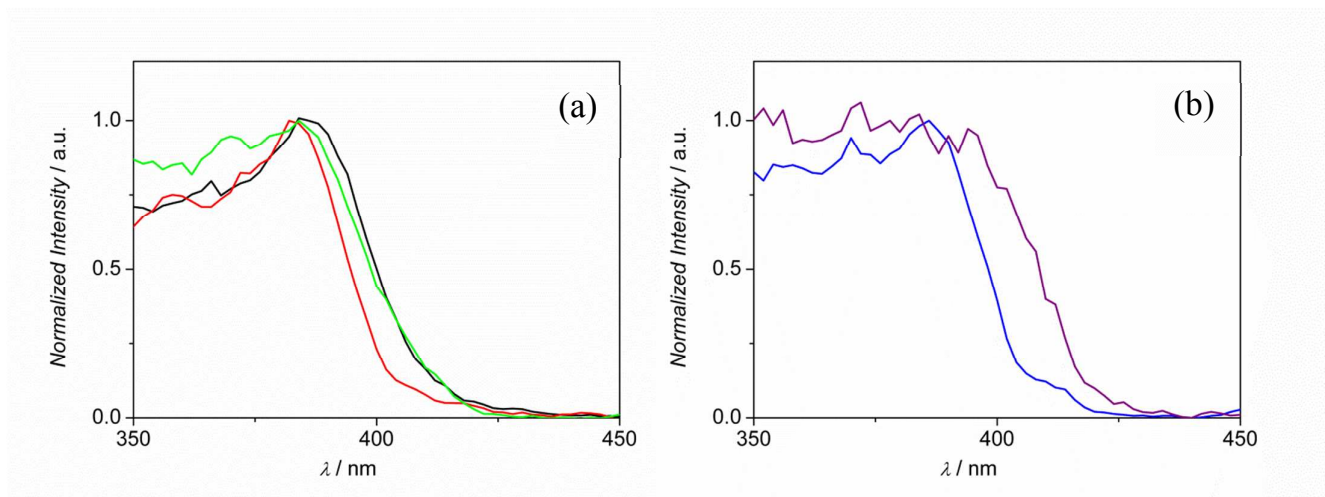

**Figure S10.** Excitation spectra collected on phosphorescence maxima of (a) **2** (black), **3** (red), and **4** (green) and (b) **2<sub>2</sub>·I<sub>2</sub>F<sub>4</sub>** (blue) and **4<sub>2</sub>·I<sub>2</sub>F<sub>4</sub>** (purple) in the solid state. Gating parameters: delay: 0.1 ms, gate: 2-3 ms.

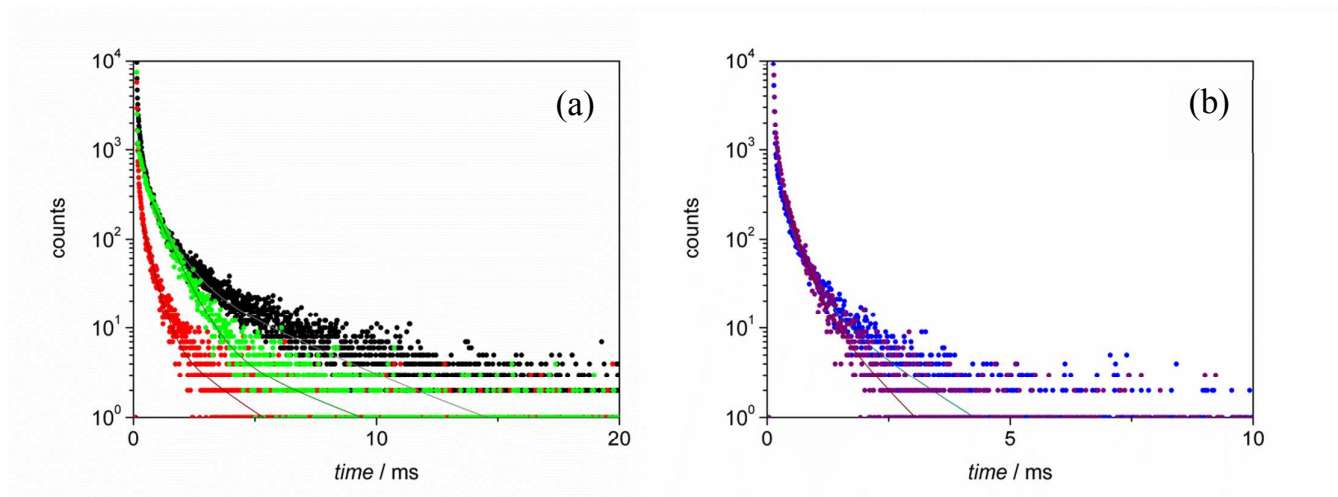

**Figure S11.** Phosphorescence decays, on a semi-log scale, of (a) **2** (black), **3** (red), and **4** (green) and (b) **2<sub>2</sub>·I<sub>2</sub>F<sub>4</sub>** (blue) and **4<sub>2</sub>·I<sub>2</sub>F<sub>4</sub>** (purple) in the solid state at room temperature, and bi-exponential fittings.



## X-ray data

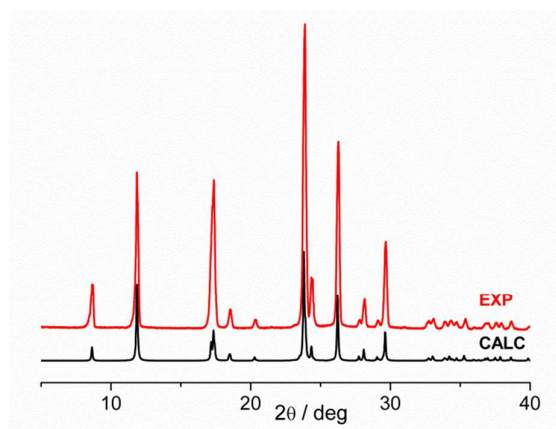

**Figure S12.** Comparison of calculated (on the basis of single crystal data) and measured X-ray powder patterns for compound **1**.

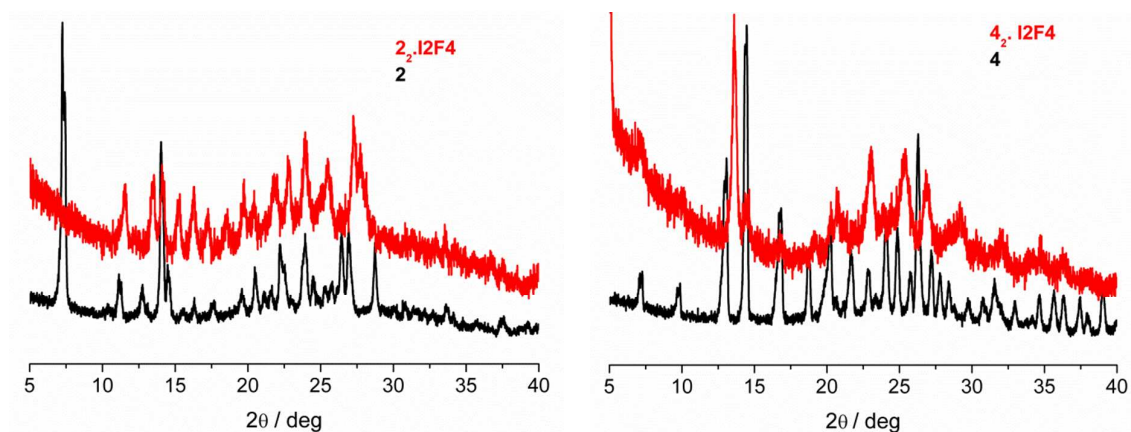

**Figure S13.** Comparison of experimental X-ray powder patterns for compound **2** and **4** and the relative co-crystals with the **12F4** co-former, namely  $2_2 \cdot 12F4$  and  $4_2 \cdot 12F4$ , left and right respectively.

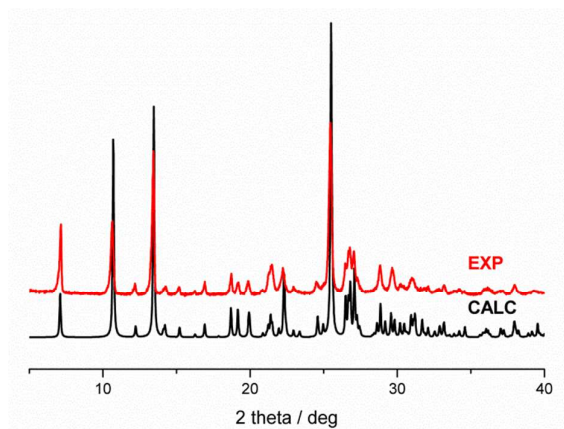

**Figure S14.** Comparison of calculated (on the basis of single crystal data) and measured X-ray powder patterns for compound **3**.

**Table S1.** Crystallographic data and details of measurements for compound **3**.

|                                                                    | <b>3</b>                                                        |
|--------------------------------------------------------------------|-----------------------------------------------------------------|
| Formula                                                            | C <sub>18</sub> H <sub>11</sub> BrN <sub>2</sub> O <sub>2</sub> |
| fw                                                                 | 367.20                                                          |
| Cryst. System                                                      | Triclinic                                                       |
| Space group                                                        | P-1                                                             |
| Z                                                                  | 2                                                               |
| a (Å)                                                              | 7.0727(8)                                                       |
| b (Å)                                                              | 8.796 (1)                                                       |
| c (Å)                                                              | 12.650 (1)                                                      |
| $\alpha$ (deg)                                                     | 92.803(9)                                                       |
| $\beta$ (deg)                                                      | 98.280(9)                                                       |
| $\gamma$ (deg)                                                     | 109.299(10)                                                     |
| V (Å <sup>3</sup> )                                                | 731.06(1)                                                       |
| D <sub>calc</sub> (Mg/m <sup>3</sup> )                             | 1.668                                                           |
| $\mu$ (mm <sup>-1</sup> )                                          | 2.823                                                           |
| Measd reflns                                                       | 4785                                                            |
| Indep reflns                                                       | 2819                                                            |
| R <sub>1</sub> [on F <sub>0</sub> <sup>2</sup> , I>2 $\sigma$ (I)] | 0.1040                                                          |
| wR <sub>2</sub> (all data)                                         | 0.3016                                                          |
